# Supplementary material for: A set of highly informative rat simple sequence length polymorphism (SSLP) markers and genetically defined rat strains
Source: PubMed Central journal article supplement (PMC1475628; doi:10.1186/1471-2156-7-19), 2006-04-04
Supplement: 1471-2156-7-19-S3.pdf [file 1471-2156-7-19-S3.pdf]

**% of informative markers per cross**

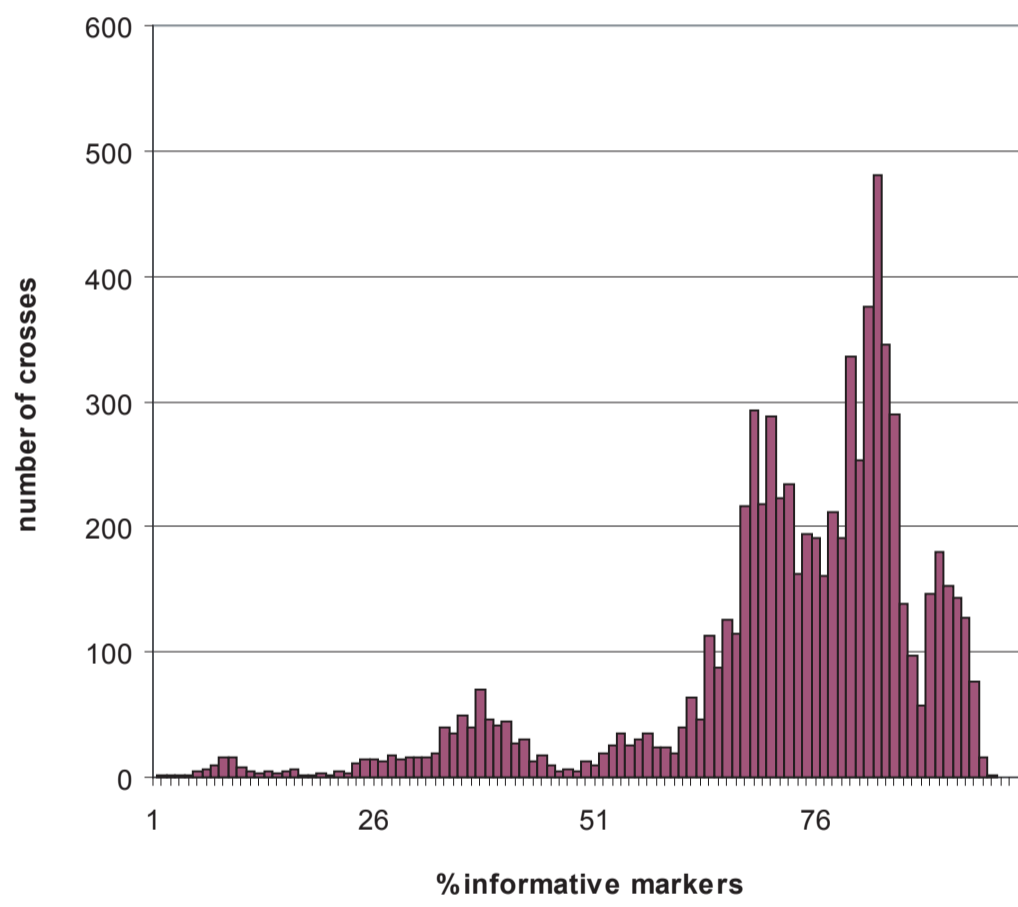

**Supplementary Figure 1**
